# Supplementary material
Source: Springer Nature journal article supplement (https://www.springermedizin.de/resource/supplementary/12885_2012_3580_MOESM2_ESM.pdf/9464174)

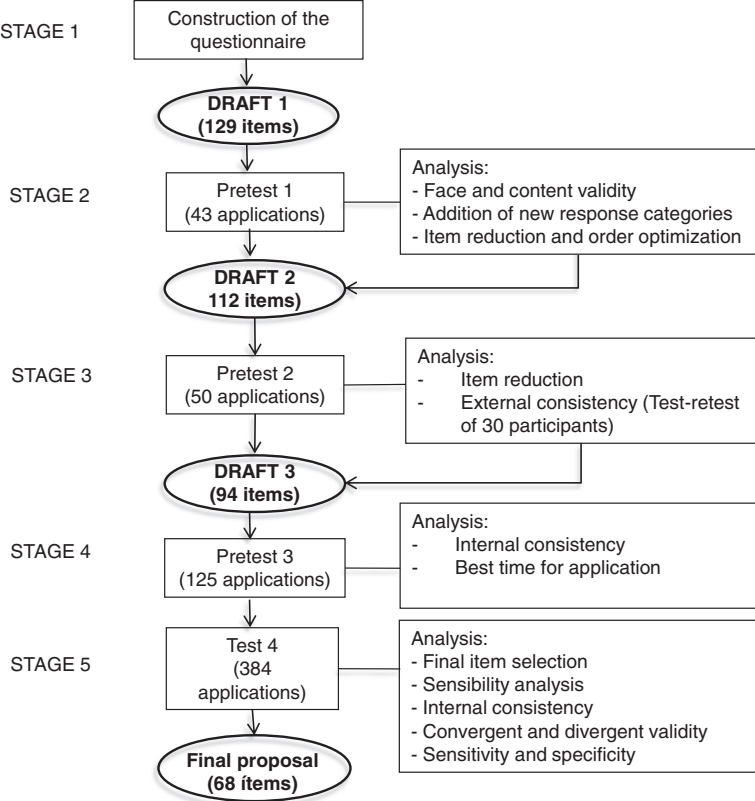

Supplement: MOESM2 [file 9464174]
